# Supplementary material
Source: publisher site journal article supplement (https://www.dovepress.com/article/457046)
Supplement: Supplementary file 1 [file get_supplementary_file.php]

**Supplementary Table 1.** Collinearity diagnostics of source of information about the war in Ukraine among scores of DASS, IES-R, and rumination

| Participants in Poland | Tolerance | VIF | Eigenvalue | Condition index |
| --- | --- | --- | --- | --- |
| Internet | 0.999 | 1.001 | 0.898 | 1.752 |
| Television | 0.968 | 1.033 | 0.716 | 1.962 |
| Radio | 0.954 | 1.049 | 0.534 | 2.272 |
| Newspaper | 0.976 | 1.024 | 0.095 | 5.337 |
| Participants in Ukraine | Tolerance | VIF | Eigenvalue | Condition index |
| Internet | 0.997 | 1.003 | 1.039 | 1.520 |
| Television | 0.925 | 1.081 | 0.857 | 1.674 |
| Radio | 0.909 | 1.100 | 0.546 | 2.096 |
| Newspaper | 0.979 | 1.021 | 0.156 | 3.921 |

VIF: variance inflation factor; DASS: Depression, Anxiety and Stress Scale; IES-R: Impact of Event Scale-Revised
